# Supplementary material for: Interesting thermal variations owing to cationic ring structural features in protic ionic liquids
Source: Royal Society of Chemistry journal article supplement (doi:10.1039/c3cp50314c), 2013-01-01
Supplement: c3cp50314c.pdf [file c3cp50314c.pdf]

## Electronic Supporting Information

Interesting thermal variations owing to cationic ring structural features in  
protic ionic liquids

Gitanjali Rai<sup>a</sup>, Anil Kumar<sup>b\*</sup>

Physical Chemistry Division, National Chemical Laboratory, Pune 411 008, India

E-mail: [a.kumar@ncl.res.in](mailto:a.kumar@ncl.res.in)

Table S1: The values of fitting parameters of Eq. (3) for ionic liquids in different solvents, average root mean squares deviation for all the calculations < 5%

| Coefficients             | q <sub>1</sub> | q <sub>2</sub> | q <sub>3</sub> |
|--------------------------|----------------|----------------|----------------|
| [EMIM][BF <sub>4</sub> ] | -2882±33       | 2424±63        | -              |
| [BMIM][BF <sub>4</sub> ] | -847 ±6        | 568±10         | -              |
| [MIM][BF <sub>4</sub> ]  | 4938±112       | -84396±1372    | 498023±5944    |
| NaCl                     | -1654±91       | 8571±137       | -              |

Table S2: The limiting excess molar partial enthalpies,  $H^{E,\infty}_{IL}$  and the binding energies ( $\Delta E$ ) for different solutes used in the present study

|                                             | NaCl | [MIM][BF <sub>4</sub> ] | [EMIM][BF <sub>4</sub> ] | [BMIM][BF <sub>4</sub> ] |
|---------------------------------------------|------|-------------------------|--------------------------|--------------------------|
| $H^{E,\infty}_{IL}$ (kJ mol <sup>-1</sup> ) | 97   | -215                    | 205                      | 104                      |
| Binding energies (kJ mol <sup>-1</sup> )    | -756 | -383                    | -348                     | -352                     |

Table S3: The excess partial molar enthalpy  $H_{IL}^E$  data for [EMIM][BF<sub>4</sub>]-water system

| $m^{0.5}/(\text{mol kg}^{-1})^{0.5}$ | $H_{IL}^E/(\text{kJ mol}^{-1})$ |
|--------------------------------------|---------------------------------|
| 0                                    | 204585                          |
| 0.00114                              | 166702                          |
| 0.00158                              | 152136                          |
| 0.00253                              | 126646                          |
| 0.00341                              | 105707                          |
| 0.00411                              | 91142                           |
| 0.00607                              | 57560                           |
| 0.00859                              | 29382                           |
| 0.01052                              | 19077                           |
| 0.01214                              | 14252                           |
| 0.01358                              | 11416                           |
| 0.01487                              | 9494                            |
| 0.01606                              | 8246                            |
| 0.01717                              | 7344                            |
| 0.01822                              | 6658                            |
